# Supplementary material for: A 12 week longitudinal study of microbial translocation and systemic inflammation in undernourished HIV-infected Zambians initiating antiretroviral therapy
Source: PubMed Central journal article supplement (PMC4261887; doi:10.1186/1471-2334-14-521), 2014-09-29

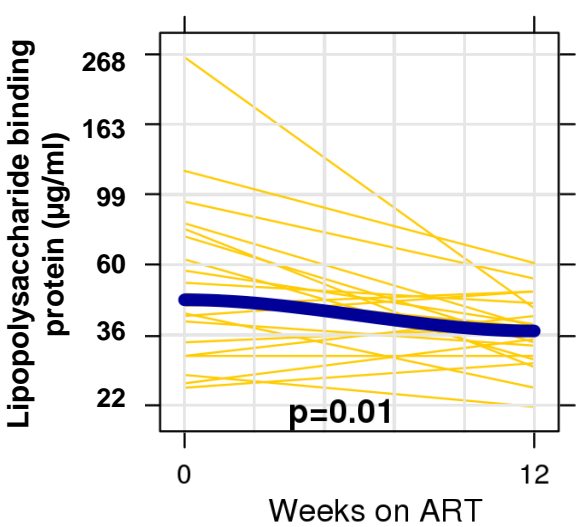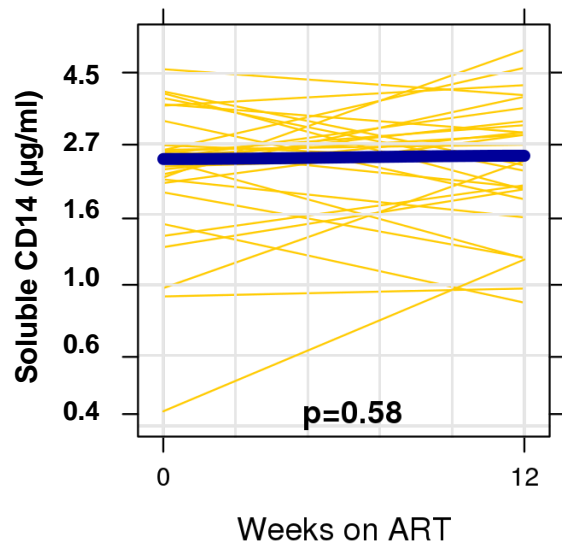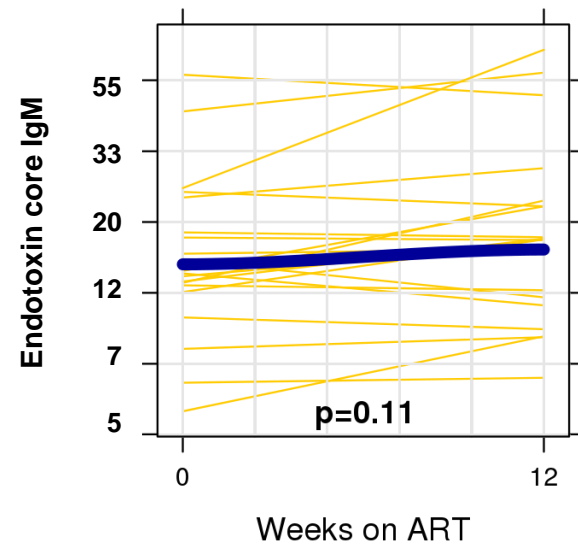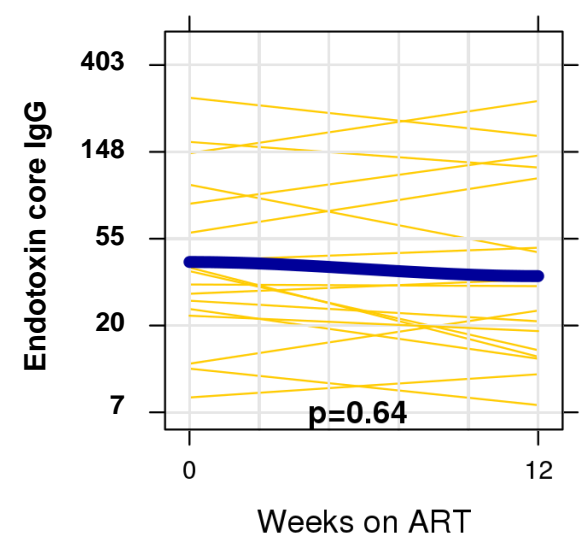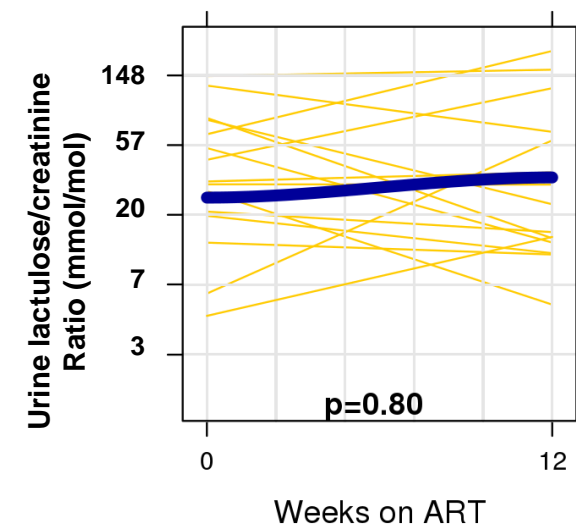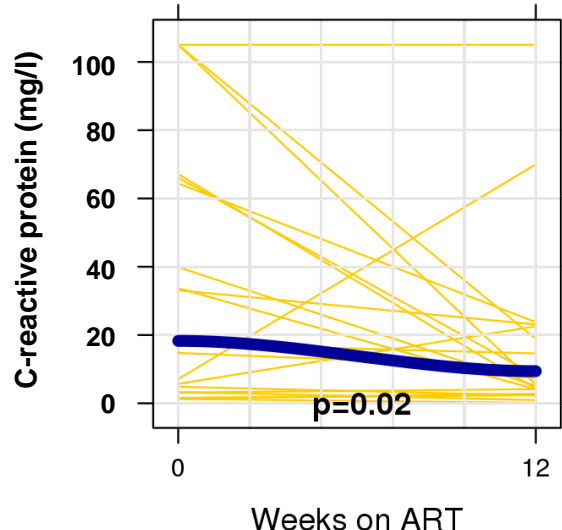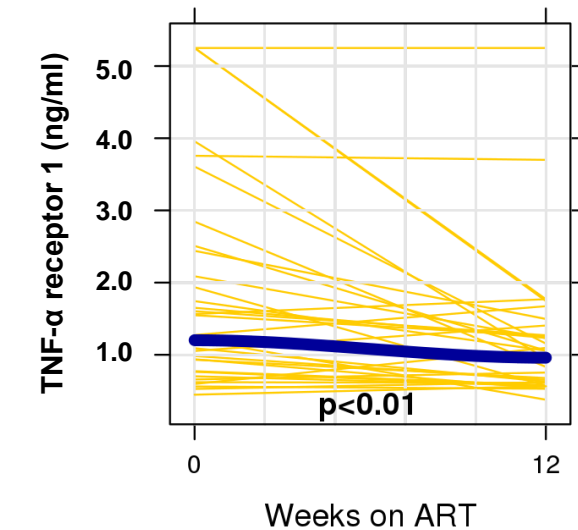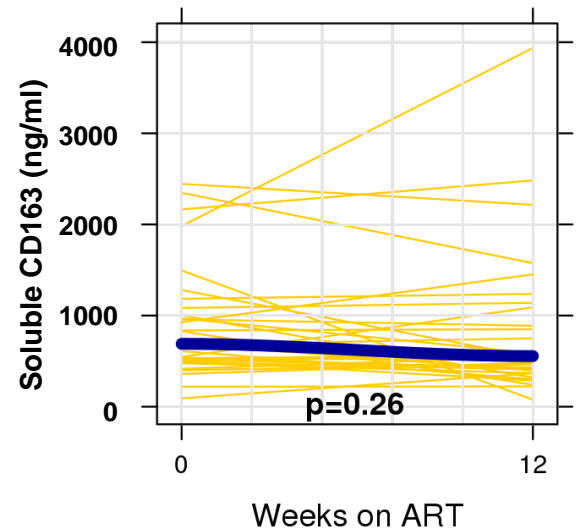

Supplement: 12879_2014_3842_MOESM2_ESM.pdf [file 12879_2014_3842_MOESM2_ESM.pdf]
